# Supplementary material for: Rhodococcus rhodochrous ATCC12674 Becomes Alkane-Tolerant upon GroEL2 Overexpression and Survives in the n-Octane Phase in Two Phase Culture
Source: PubMed Central journal article supplement (PMC4262369; doi:10.1264/jsme2.me14114), 2014-12-10
Supplement: 29_431_s1.pdf [file 29_431_s1.pdf]

## Supplemental materials

*Rhodococcus rhodochrous* ATCC12674 Becomes Alkane-Tolerant upon  
GroEL2 Overexpression and Survives in the *n*-Octane Phase in Two Phase  
5 Culture.

Hayato Takihara<sup>1</sup>, Chiaki Matsuura<sup>1</sup>, Jun Ogihara<sup>2</sup>, Noriyuki Iwabuchi<sup>1\*</sup>, and Michio  
Sunairi<sup>1</sup>.

10 <sup>1</sup>Laboratory of Molecular Microbiology, Department of Applied Biological Science,  
College of Bioresource Sciences, Nihon University, 1866 Kameino, Fujisawa,  
Kanagawa 252-8510, Japan; and <sup>2</sup>Laboratory of Enzyme Chemistry, Department of  
Chemistry and Life Science, College of Bioresource Sciences, Nihon University, 1866  
Kameino, Fujisawa, Kanagawa 252-8510, Japan

15

## Supplemental Tables

Table S1. Availability of plasmid pK4 and localization of *Rhodococcus* strains in two phase cultures containing alkanes of various carbon-chain lengths.

| Genus and species               | Strain     | Plasmid | C8   | C12     | C16 | C19  |
|---------------------------------|------------|---------|------|---------|-----|------|
| <i>Rhodococcus australis</i>    | ATCC35215  | No      | N.D. | Trn     | Trn | Trn  |
| <i>Rhodococcus coprophilus</i>  | ATCC29080  | No      | N.D. | Trn     | Trn | Trn  |
|                                 | JCM3200    | No      | N.D. | Trn     | Trn | Trn  |
| <i>Rhodococcus erythropolis</i> | ATCC27854  | No      | N.D. | Ahd     | Trn | Trn  |
|                                 | ATCC47072  | No      | N.D. | Trn     | Trn | Trn  |
|                                 | DSM1069    | No      | N.D. | Trn     | Trn | Trn  |
|                                 | JCM3201    | No      | N.D. | Trn     | Trn | Trn  |
|                                 | PR4        | Yes     | N.D. | Ahd*    | Trn | Trn* |
| <i>Rhodococcus globerulus</i>   | ATCC14346  | No      | N.D. | Ahd     | Trn | Trn  |
|                                 | ATCC15076  | No      | N.D. | Trn     | Trn | Trn  |
|                                 | ATCC21292  | No      | N.D. | Trn     | Trn | Trn  |
|                                 | ATCC25669  | No      | N.D. | Trn     | Trn | Trn  |
|                                 | ATCC25688  | No      | N.D. | Trn     | Trn | Trn  |
|                                 | ATCC3110   | No      | N.D. | Trn     | Trn | Trn  |
|                                 | ATCC14898  | No      | N.D. | Trn     | Trn | Trn  |
| <i>Rhodococcus jostii</i>       | RHA1       | Yes     | N.D. | Trn     | Trn | Trn  |
| <i>Rhodococcus opacus</i>       | ATCC170391 | No      | N.D. | Trn     | Trn | Trn  |
|                                 | ATCC51881  | No      | N.D. | Ahd/Trn | Ahd | Trn  |
|                                 | ATCC51882  | No      | N.D. | Ahd     | Trn | Trn  |
|                                 | JCM9703    | No      | N.D. | Trn     | Trn | Trn  |

|                                |           |      |      |      |     |     |
|--------------------------------|-----------|------|------|------|-----|-----|
| <i>Rhodococcus percolatus</i>  | JCM10087  | No   | N.D. | Trn  | Trn | Trn |
| <i>Rhodococcus rhodnii</i>     | ATCC35071 | No   | N.D. | Trn  | Trn | Trn |
| <i>Rhodococcus rhodochrous</i> | ATCC271   | No   | N.D. | Trn  | Trn | Trn |
|                                | ATCC999   | No   | N.D. | Trn  | Trn | Trn |
|                                | ATCC4001  | No   | N.D. | Ahd  | Ahd | Trn |
|                                | ATCC13808 | No   | N.D. | Ahd  | Ahd | Trn |
|                                | ATCC14348 | No   | N.D. | Ahd  | Trn | Trn |
|                                | ATCC14349 | No   | N.D. | Trn  | Trn | Trn |
|                                | ATCC15905 | No   | N.D. | Trn  | Trn | Trn |
|                                | ATCC15906 | No   | N.D. | N.D. | Trn | Trn |
|                                | ATCC184   | No   | N.D. | Ahd  | Trn | Trn |
|                                | ATCC17041 | No   | N.D. | Ahd  | Trn | Trn |
|                                | ATCC19150 | No   | N.D. | Trn  | Trn | Trn |
|                                | ATCC12674 | Yes  | N.D. | Trn  | Trn | Trn |
|                                | JCM2156   | No   | N.D. | Trn  | Trn | Trn |
|                                | JCM2157   | No   | N.D. | Trn  | Trn | Trn |
|                                | R-1       | Yes  | N.D. | N.D. | Trn | Trn |
|                                | R-2       | Yes  | N.D. | N.D. | Trn | Trn |
| S-1                            | Yes       | N.D. | Ahd  | Trn  | Trn |     |
| S-2                            | Yes       | N.D. | Ahd  | Ahd  | Ahd |     |
| <i>Rhodococcus ruber</i>       | IFO15591  | No   | N.D. | Ahd  | Trn | Trn |
| <i>Rhodococcus</i> sp.         | PG7-2     | No   | N.D. | Ahd  | Trn | Trn |
|                                | JCM3376   | No   | N.D. | Trn  | Trn | Trn |
|                                | JCM3391   | No   | N.D. | Ahd  | Trn | Trn |

|                           |           |    |      |     |     |     |
|---------------------------|-----------|----|------|-----|-----|-----|
| <i>Rhodococcus zopfii</i> | ATCC51349 | No | N.D. | Trn | Trn | Trn |
|                           | JCM9919   | No | N.D. | Ahd | Trn | Trn |

Four different alkanes were used in aqueous-alkane two phase cultures: *n*-octane (C8), *n*-dodecane (C12), *n*-hexadecane (C16), and pristane (C19), with log  $P_{o/w}$  values of 5.2, 6.1, 8.3, and 9.3, respectively. The final alkane concentration in the two phase cultures was 5% (v/v). *Rhodococcus* strains were cultured in IB broth (12) at 28°C with shaking (110 rpm). Localization of cells was examined using phase-contrast microscopy (Olympus DP50, Tokyo, Japan). A total of 3 independent experiments were performed, and 5 photographs were taken in each experiment (n=15). Cell localization was determined based on which phase the majority of cells were located within in reference to Fig. S1. Ahd and Trn indicate adherence of cells at the interface between the aqueous-alkane phases and translocation of cells to the alkane phase, respectively. N.D. indicates that cell localization could not be determined because of insufficient growth of tested strains. \*These data were compiled from a previous report (14).

Availability of the plasmid pK4 (4) in *Rhodococcus* strains was evaluated as follows: plasmid pK4 was introduced by electroporation as described previously (11). When required, strain-specific optimized conditions for electroporation were used. Plasmids were isolated from the transformants and examined by agarose gel electrophoresis. Yes and No indicate whether or not the introduced pK4 could be extracted from the transformant using standard methods.

Table S2. Localization of *Rhodococcus* transformants in two phase cultures containing alkanes of various carbon-chain lengths.

| Strain    | Plasmid    | C8   | C12     | C16 | C19  |
|-----------|------------|------|---------|-----|------|
| PR4       | None       | N.D. | Ahd     | Trn | Trn  |
|           | pK4-EL2-1  | Ahd  | Trn     | Trn | Trn  |
|           | pK4-EL2-AT | Adh  | Trn     | Trn | N.T. |
| ATCC12674 | None       | N.D. | Trn     | Trn | Trn  |
|           | pK4-EL2-1  | Trn  | Trn     | Trn | Trn  |
|           | pK4-EL2-AT | N.D. | Trn     | Trn | Trn  |
| R-1       | None       | N.D. | N.D.    | Trn | Trn  |
|           | pK4-EL2-1  | N.D. | Ahd     | Trn | Trn  |
|           | pK4-EL2-R1 | N.D. | Ahd     | Trn | Trn  |
| R-2       | None       | N.D. | N.D.    | Trn | Trn  |
|           | pK4-EL2-1  | N.D. | Ahd     | Trn | Trn  |
|           | pK4-EL2-R2 | N.D. | Ahd     | Trn | Trn  |
| S-1       | None       | N.D. | Ahd     | Trn | Trn  |
|           | pK4-EL2-1  | N.D. | Ahd/Trn | Trn | Trn  |
|           | pK4-EL2-S1 | N.D. | Ahd     | Trn | Trn  |
| S-2       | None       | N.D. | Ahd     | Ahd | Ahd  |
|           | pK4-EL2-1  | N.D. | Ahd     | Ahd | Ahd  |
|           | pK4-EL2-S2 | N.D. | Ahd     | Ahd | Ahd  |

Plasmid construction and transformation were performed as described previously (11, 14). Plasmids pK4-EL2-AT, R1, R2, S1, and S2 encoded complete CDSs of *groEL2* derived from *R. rhodochrous* strains ATCC12674, R-1, R-2, S-1, and S-2, respectively.

5

Degenerate PCR primers (P1 = ATG GCI AAR ATH ATH GCI TTY GAY GAR GAR GCI MGI; P2 = RAA RTC CAT ICC ICC CAT ICC ICC IGT IGG RTC ICC) for amplification of *groEL2* CDSs of other *Rhodococcus* strains were constructed and used to determine the sequence of the cloned fragments. When required, a primer extension  
5 method was also used for determination of the sequence of the cloned fragments. The resulting DNA sequences were found to be identical to *groEL2*. The plasmid containing the cloned *groEL2* gene was digested using *EcoRI*, and the 1.6-kb *EcoRI* fragment was then inserted into the *EcoRI* restriction site of the *E. coli-Rhodococcus* shuttle vector pK4 (4).

10 Four different alkanes were used in aqueous-alkane two phase cultures: *n*-octane (C8), *n*-dodecane (C12), *n*-hexadecane (C16), and pristane (C19), with log  $P_{o/w}$  values of 5.2, 6.1, 8.3, and 9.3, respectively. The final alkane concentration in the two phase cultures was 5% (v/v). *Rhodococcus* strains and their transformants were cultured in IB  
15 IB medium at a concentration of 25-200  $\mu\text{g mL}^{-1}$ .

Localization of cells in the two phase culture was examined using phase-contrast microscopy (Olympus DP50, Tokyo, Japan). A total of 3 independent experiments were performed, and 5 photographs were taken in each experiment (n=15). In reference to Fig. S1, cell localization was determined based on which phase the majority of cells were  
20 located within. Ahd and Trn indicate adherence of cells at the interface between the aqueous-alkane phases and translocation of cells into the alkane phase, respectively. N.D. indicates that cell localization could not be determined because of insufficient growth of the tested strains. N.T. indicates 'not tested'.

### Supplemental figure

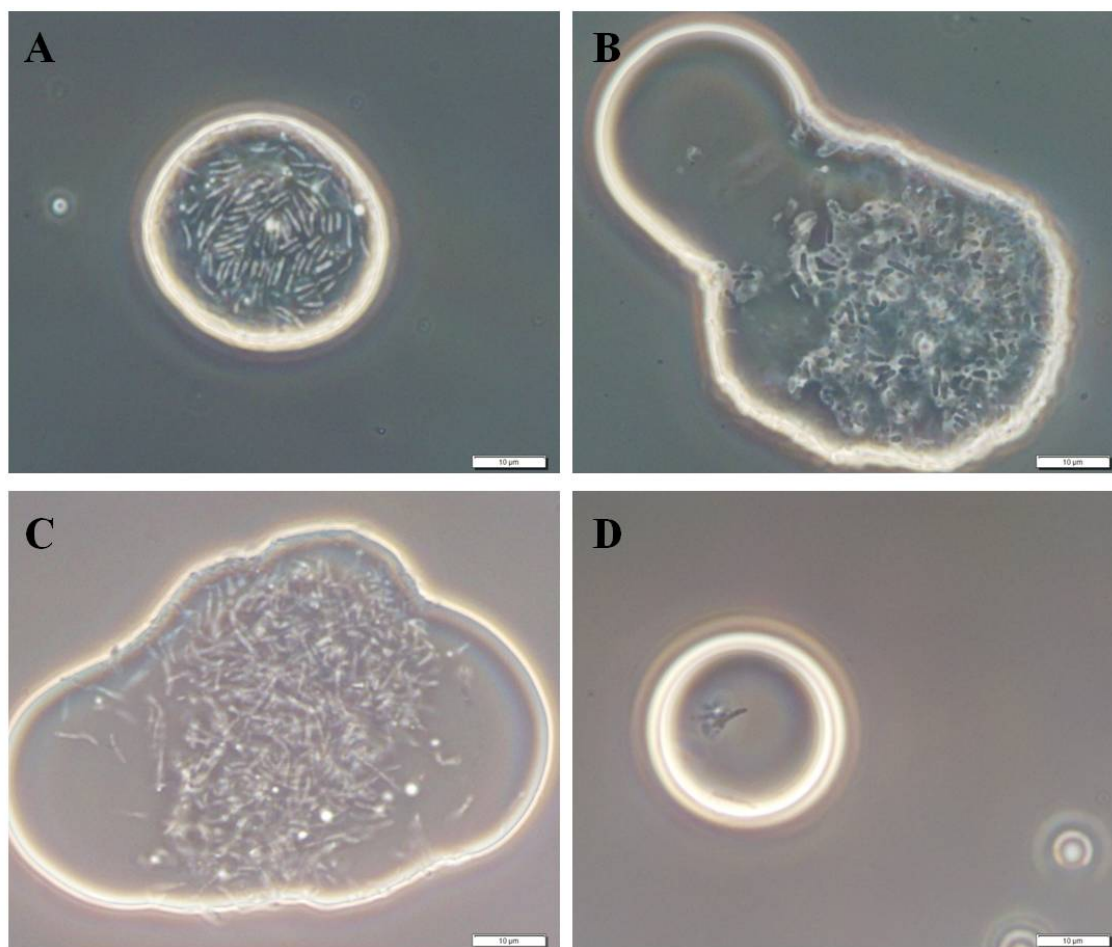

**Fig. S1.** Typical localization of *Rhodococcus* strains in alkane-containing two phase  
5 culture. Panels A, B, and C show representative photographs of translocated cells in the  
alkane phase, adherent cells at the aqueous-alkane interface, and both translocated and  
adherent cells, respectively. In panel D, no translocation of cells to the alkane phase was  
detected because the bacteria either grew poorly in the alkane phase and/or most of the  
cells remained in the aqueous phase. A, *R. erythropolis* PR4 grown in IB medium in the  
10 presence of C16; B, *R. rhodochrous* ATCC12674 grown in IB medium in the presence  
of C12; C, *R. opacus* ATCC51881 grown in IB medium in the presence of C12; D, *R.*  
*rhodochrous* S-2 grown in IB medium in the presence of C8.
